# Supplementary material for: Contribution to discussion of the paper by Vardi and Lee.
Source: Springer Nature journal article supplement (doi:10.1038/s41379-022-01135-2), 1993-01-01
Supplement: MOESM1 [file 41379_2022_1135_MOESM1_ESM.pdf]

**Supplementary information for  
'Results of a worldwide survey on the currently used histopathological diagnostic criteria for invasive lobular  
breast cancer' by De Schepper et al.**

**Table of Contents**

|                                                                                              |          |
|----------------------------------------------------------------------------------------------|----------|
| <b>Supplementary Table 1: survey questionnaire .....</b>                                     | <b>2</b> |
| <b>Supplementary Table 2: characteristics of participants per continent.....</b>             | <b>4</b> |
| <b>Supplementary Table 3: Overview of used concentration per used E-cadherin clone .....</b> | <b>5</b> |
| <b>Supplementary Table 4: E-cadherin antibody clone per continent .....</b>                  | <b>7</b> |
| <b>Supplementary Table 5: staining procedures per antibody .....</b>                         | <b>8</b> |
| <b>Supplementary Table 6: concentration per reported clone.....</b>                          | <b>9</b> |
| Supplementary Table 6a: concentration per clone for $\beta$ -catenin .....                   | 9        |
| Supplementary Table 6b: concentration per clone for p120-catenin.....                        | 9        |
| Supplementary Table 6c: concentration per clone for other reported antibodies .....          | 10       |

**Supplementary Table 1: survey questionnaire**

|                                                                                                                           |
|---------------------------------------------------------------------------------------------------------------------------|
| <b>In which country do you practice pathology?</b>                                                                        |
| <b>What is your field of interest in pathology?</b>                                                                       |
| <b>In which center do you perform your activities:</b>                                                                    |
| <b>What is the average volume/year of breast cancer samples in your center?</b>                                           |
| <b>How many pathologists handle breast cancer specimens in your laboratory</b>                                            |
| <b>Do you perform consensus diagnosis for difficult cases in your center?</b>                                             |
| <b>Are you aware of national/international guidelines recommending the use of IHC for the diagnosis of ILC?</b>           |
| <b>How do you diagnose an invasive lobular carcinoma?</b>                                                                 |
| <b>Which subtypes of ILC do you report? (Multiple options possible):</b>                                                  |
| Classic                                                                                                                   |
| Non-classic                                                                                                               |
| Mixed non-classic                                                                                                         |
| Alveolar                                                                                                                  |
| Solid                                                                                                                     |
| Trabecular                                                                                                                |
| Histiocytoid/Apocrine                                                                                                     |
| Pleomorphic                                                                                                               |
| Tubulo-lobular                                                                                                            |
| Invasive carcinoma with mixed ductal and lobular features                                                                 |
| Mucinous                                                                                                                  |
| All of the above                                                                                                          |
| Other                                                                                                                     |
| <b>What is the proportion of ILCs diagnosed with ancillary IHC in your institution?</b>                                   |
| <b>If you perform IHC, which antibody/antibodies do you use?</b>                                                          |
| E-cadherin                                                                                                                |
| Beta- catenin                                                                                                             |
| p120 catenin                                                                                                              |
| Other (specify later)                                                                                                     |
| Double staining (please specify)                                                                                          |
| <b>Which patterns of staining's do you use to support the diagnosis of ILC by E-cadherin? (multiple options possible)</b> |
| Complete absence of membranous E-cadherin staining                                                                        |
| Dot-like, perinuclear Golgi-type pattern                                                                                  |
| Fragmented, focal, or beaded expression of E-cadherin                                                                     |
| A complete, but weak membranous E-cadherin                                                                                |
| All of the above                                                                                                          |
| Other                                                                                                                     |
| <b>Do you use upfront E-cadherin IHC for every breast cancer sample?</b>                                                  |
| <b>When E-cadherin is positive but the H&amp;E pattern is lobular: do you use p120 catenin or / and beta-catenin?</b>     |
| <b>Which pattern do you consider for ILC diagnosis? (Multiple options possible):</b>                                      |
| cytoplasmic or negative beta catenin                                                                                      |
| cytoplasmic or nuclear p120 staining                                                                                      |
| Do you use an external control for staining?                                                                              |
| <b>If you use E-cadherin, what are its specifications?</b>                                                                |
| Clone:                                                                                                                    |
| Firm:                                                                                                                     |
| Concentration:                                                                                                            |

|                                                                                             |
|---------------------------------------------------------------------------------------------|
| Tissue for validation:                                                                      |
| <b>How do you perform antigen retrieval for E-cadherin?</b>                                 |
| <b>If you perform HIER, how is it performed?</b>                                            |
| <b>Which buffer is used?</b>                                                                |
| <b>At which pH?</b>                                                                         |
| <b>If you use enzymatic retrieval, which agent do you use?</b>                              |
| <b>If you use beta-catenin, what are its specifications?</b>                                |
| Clone:                                                                                      |
| Firm:                                                                                       |
| Concentration:                                                                              |
| Tissue for validation:                                                                      |
| <b>How do you perform antigen retrieval for beta-catenin?</b>                               |
| <b>If you perform HIER, how is it performed?</b>                                            |
| <b>Which buffer is used?</b>                                                                |
| <b>At which pH?</b>                                                                         |
| <b>If you use enzymatic retrieval, which agent do you use?</b>                              |
| <b>If you use p120-catenin, what are its specifications?</b>                                |
| Clone:                                                                                      |
| Firm:                                                                                       |
| Concentration:                                                                              |
| Tissue for validation:                                                                      |
| <b>How do you perform antigen retrieval for p120-catenin?</b>                               |
| <b>If you perform HIER, how is it performed?</b>                                            |
| <b>Which buffer is used?</b>                                                                |
| <b>At which pH?</b>                                                                         |
| <b>If you use enzymatic retrieval, which agent do you use?</b>                              |
| <b>Do you use another antibody other than E-cadherin, beta-catenin and/or p120-catenin?</b> |
| <b>If you use another antibody, what are its specifications?</b>                            |
| Specify antibody:                                                                           |
| Clone:                                                                                      |
| Firm:                                                                                       |
| Concentration:                                                                              |
| Tissue for validation:                                                                      |
| <b>How do you perform antigen retrieval for this antibody?</b>                              |
| <b>If you perform HIER, how is it performed?</b>                                            |
| <b>Which buffer is used?</b>                                                                |
| <b>At which pH?</b>                                                                         |
| <b>If you use enzymatic retrieval, which agent do you use?</b>                              |
| <b>Do you use DNA sequencing for cases with inconclusive features?</b>                      |

**Supplementary Table 2: characteristics of participants per continent**

|                                                                   |                             | Africa<br>n (%) | Asia<br>n (%) | Europe<br>n (%) | North<br>America<br>n (%) | Oceania<br>n (%) | South<br>America<br>n (%) | p-<br>value |
|-------------------------------------------------------------------|-----------------------------|-----------------|---------------|-----------------|---------------------------|------------------|---------------------------|-------------|
| Center of<br>activities                                           | Large tertiary<br>hospital  | 3 (75.0)        | 11<br>(40.7)  | 26<br>(28.3)    | 2 (18.2)                  | 1 (50.0)         | 1 (9.1)                   | 0.1424      |
|                                                                   | Private laboratory          | 0 (0.0)         | 1 (3.7)       | 9 (9.8)         | 0 (0.0)                   | 0 (0.0)          | 4 (36.4)                  |             |
|                                                                   | Small community<br>hospital | 0 (0.0)         | 2 (7.4)       | 4 (4.3)         | 0 (0.0)                   | 0 (0.0)          | 1 (9.1)                   |             |
|                                                                   | University Hospital         | 1 (25.0)        | 13<br>(48.1)  | 53<br>(57.6)    | 9 (81.8)                  | 1 (50.0)         | 5 (45.5)                  |             |
| Average<br>volume breast<br>cancer<br>samples/year                | 0-150 samples               | 1 (25.0)        | 4 (14.8)      | 1 (1.1)         | 0 (0.0)                   | 0 (0.0)          | 2 (18.2)                  | 0.0005      |
|                                                                   | 151-300 samples             | 2 (50.0)        | 10<br>(37.0)  | 15<br>(16.3)    | 1 (9.1)                   | 0 (0.0)          | 1 (9.1)                   |             |
|                                                                   | 301-500 samples             | 1 (25.0)        | 3 (11.1)      | 22<br>(23.9)    | 0 (0.0)                   | 2<br>(100.0)     | 2 (18.2)                  |             |
|                                                                   | >500 samples                | 0 (0.0)         | 10<br>(37.0)  | 54<br>(58.7)    | 10<br>(90.9)              | 0 (0.0)          | 6 (54.5)                  |             |
| Number of<br>pathologist<br>handling<br>breast cancer<br>specimen | 1                           | 0 (0.0)         | 7 (25.9)      | 1 (1.1)         | 0 (0.0)                   | 0 (0.0)          | 2 (18.2)                  | 0.0005      |
|                                                                   | 1 to 4                      | 0 (0.0)         | 11<br>(40.7)  | 51<br>(55.4)    | 4 (36.4)                  | 0 (0.0)          | 8 (72.7)                  |             |
|                                                                   | 5 or more                   | 4<br>(100.0)    | 9 (33.3)      | 40<br>(43.5)    | 7 (63.6)                  | 2<br>(100.0)     | 1 (9.1)                   |             |
| Total                                                             |                             | 4               | 27            | 92              | 11                        | 2                | 11                        |             |

**Supplementary Table 3: Overview of used concentration per used E-cadherin clone**

| Concentration per clone | Number of participants |
|-------------------------|------------------------|
| <b>NCH-38</b>           | <b>38 (42%)</b>        |
| RTU                     | 12 (13%)               |
| 1/100                   | 10 (11%)               |
| 1/50                    | 4 (4%)                 |
| 1/200                   | 3 (3%)                 |
| 1/300                   | 1 (1%)                 |
| 1/50 to 1/100           | 1 (1%)                 |
| 1/170                   | 1 (1%)                 |
| 1/25                    | 1 (1%)                 |
| Missing data            | 5 (5%)                 |
| <b>Clone 36</b>         | <b>15 (16%)</b>        |
| RTU                     | 8 (9%)                 |
| 0,314 µg/ml             | 2 (2%)                 |
| 1/200                   | 1 (1%)                 |
| Missing data            | 4 (4%)                 |
| <b>EP700Y</b>           | <b>14 (15%)</b>        |
| 1/200                   | 4 (4%)                 |
| RTU                     | 5 (5%)                 |
| 0,314 µg/ml             | 1 (1%)                 |
| 1/700                   | 1 (1%)                 |
| unknown                 | 1 (1%)                 |
| Missing data            | 1 (1%)                 |
| <b>Clone 36B5</b>       | <b>7 (8%)</b>          |
| RTU                     | 3 (3%)                 |
| 1/100                   | 1 (1%)                 |
| 1/40                    | 1 (1%)                 |
| Missing data            | 2 (2%)                 |
| <b>unknown</b>          | <b>6 (7%)</b>          |
| Missing data            | 6 (7%)                 |
| <b>4A2C7</b>            | <b>5 (5%)</b>          |
| 57µg/l                  | 1 (1%)                 |
| 1,25 µg/ml              | 1 (1%)                 |
| 1/50                    | 1 (1%)                 |
| 570µg/l                 | 1 (1%)                 |
| Missing data            | 1 (1%)                 |
| <b>HECD1</b>            | <b>1 (1%)</b>          |

|                    |               |
|--------------------|---------------|
| 1/50               | 1 (1%)        |
| <b>IHC564</b>      | <b>1 (1%)</b> |
| Unknown            | 1 (1%)        |
| <b>EP6</b>         | <b>1 (1%)</b> |
| 1/1000             | 1 (1%)        |
| <b>ECH-6</b>       | <b>1 (1%)</b> |
| 1/100              | 1 (1%)        |
| <b>G-10</b>        | <b>1 (1%)</b> |
| 1/100              | 1 (1%)        |
| <b>GM016</b>       | <b>1 (1%)</b> |
| RTU                | 1 (1%)        |
| <b>Grand Total</b> | <b>91</b>     |

**Supplementary Table 4: E-cadherin antibody clone per continent**

|                      |            |
|----------------------|------------|
| <b>Europe</b>        | <b>92</b>  |
| Missing data         | 36         |
| NCH-38               | 24         |
| EP700Y               | 11         |
| Clone 36             | 10         |
| Clone 36B5           | 5          |
| 4A2C7                | 2          |
| ECH-6                | 1          |
| HECD1                | 1          |
| GM016                | 1          |
| G-10                 | 1          |
| <b>Asia</b>          | <b>27</b>  |
| NCH-38               | 8          |
| Missing data         | 8          |
| unknown              | 4          |
| 4A2C7                | 3          |
| Clone 36             | 2          |
| Clone 36B5           | 1          |
| IHC564               | 1          |
| <b>South America</b> | <b>11</b>  |
| NCH-38               | 4          |
| Missing data         | 4          |
| EP700Y               | 2          |
| EP6                  | 1          |
| <b>North America</b> | <b>11</b>  |
| Missing data         | 7          |
| Clone 36             | 2          |
| NCH-38               | 1          |
| Clone 36B5           | 1          |
| <b>Africa</b>        | <b>4</b>   |
| Missing data         | 2          |
| EP700Y               | 1          |
| NCH-38               | 1          |
| <b>Oceania</b>       | <b>2</b>   |
| Missing data         | 1          |
| Clone 36             | 1          |
| <b>Grand Total</b>   | <b>147</b> |

**Supplementary Table 5: staining procedures per antibody**

| <b>Epitope retrieval modality</b>     | <b>E-cadherin</b> | <b>β-catenin</b> | <b>p120-catenin</b> |
|---------------------------------------|-------------------|------------------|---------------------|
| Enzymatic retrieval                   | 2                 | 1                | 0                   |
| Heat induced epitope retrieval (HIER) | 76                | 31               | 23                  |
| No Antigen retrieval                  | 10                | 4                | 5                   |
| Unknown                               | 3                 | 0                | 1                   |
| <b>Grand Total</b>                    | <b>91</b>         | <b>36</b>        | <b>29</b>           |
|                                       |                   |                  |                     |
| <b>HIER modality</b>                  | <b>E-cadherin</b> | <b>β-catenin</b> | <b>p120-catenin</b> |
| Hot plate                             | 20                | 9                | 6                   |
| Microwave                             | 7                 | 2                | 1                   |
| Pressure cooker                       | 4                 | 6                | 2                   |
| Stainer                               | 28                | 11               | 11                  |
| Steamer                               | 2                 | 0                | 1                   |
| Water bath                            | 3                 | 1                | 0                   |
| Unknown                               | 11                | 1                | 2                   |
| Other                                 | 1                 | 1                | 0                   |
| <b>Grand Total</b>                    | <b>76</b>         | <b>31</b>        | <b>23</b>           |
|                                       |                   |                  |                     |
| <b>HIER buffer</b>                    | <b>E-cadherin</b> | <b>β-catenin</b> | <b>p120-catenin</b> |
| <b>Acidic</b>                         | <b>3</b>          | <b>5</b>         | <b>2</b>            |
| Low pH (<7,0)                         | 3                 | 5                | 2                   |
| <b>Basic pH</b>                       | <b>60</b>         | <b>24</b>        | <b>19</b>           |
| High pH (>8,0)                        | 38                | 10               | 10                  |
| slightly basic pH [7,0-8,0]           | 8                 | 6                | 4                   |
| Unknown                               | 14                | 8                | 5                   |
| <b>Missing data</b>                   | <b>13</b>         | <b>2</b>         | <b>2</b>            |
| <b>Grand Total</b>                    | <b>76</b>         | <b>31</b>        | <b>23</b>           |



## Supplementary Table 6: concentration per reported clone

Supplementary Table 6a: concentration per clone for  $\beta$ -catenin

| Concentration per clone             | Number of participants |
|-------------------------------------|------------------------|
| <b>Clone 14</b>                     | <b>20</b>              |
| RTU                                 | 6                      |
| unknown                             | 5                      |
| 1/100                               | 2                      |
| 1/200                               | 2                      |
| 1/75                                | 1                      |
| 1/150                               | 1                      |
| 1/300                               | 1                      |
| 1.25 $\mu$ g/ml                     | 1                      |
| 1/250                               | 1                      |
| <b><math>\beta</math>-Catenin-1</b> | <b>12</b>              |
| 1/200                               | 3                      |
| RTU                                 | 2                      |
| 1/1000                              | 1                      |
| 1/400                               | 1                      |
| 2.2mg/L                             | 1                      |
| unknown                             | 4                      |
| <b>17C2</b>                         | <b>3</b>               |
| 1/100                               | 1                      |
| RTU                                 | 1                      |
| unknown                             | 1                      |
| <b>CAT-5H10</b>                     | <b>2</b>               |
| 1/200                               | 1                      |
| 1/100                               | 1                      |
| unknown                             | 2                      |
| <b>Grand Total</b>                  | <b>38</b>              |

Supplementary Table 6b: concentration per clone for p120-catenin

| Concentration per clone | Number of participants |
|-------------------------|------------------------|
| <b>Clone 98</b>         | <b>14</b>              |
| unknown                 | 5                      |
| RTU                     | 3                      |
| 1/500                   | 1                      |
| 1/200                   | 1                      |
| 1/150                   | 1                      |
| 0.076 $\mu$ g/mL        | 1                      |
| 1/250                   | 1                      |
| 1/300                   | 1                      |
| <b>EP66</b>             | <b>7</b>               |
| RTU                     | 3                      |

|                    |           |
|--------------------|-----------|
| 1/1800             | 1         |
| 1/200              | 1         |
| 1/75               | 1         |
| unknown            | 1         |
| <b>MRQ-5</b>       | <b>5</b>  |
| 1/50               | 2         |
| RTU                | 1         |
| 1/100              | 1         |
| 1/400              | 1         |
| unknown            | 4         |
| <b>15D2</b>        | <b>1</b>  |
| RTU                | 1         |
| <b>Grand Total</b> | <b>29</b> |

Supplementary Table 6c: concentration per clone for other reported antibodies

| Concentration per clone        | Number of participants |
|--------------------------------|------------------------|
| <b>Catenin Delta-1 (D7S2M)</b> | <b>1</b>               |
| 0.7 µg/mL                      | 1                      |
| <b>Cytokeratin 34βE12</b>      | <b>5</b>               |
| 1/100                          | 1                      |
| 1/300                          | 1                      |
| 1/50                           | 2                      |
| RTU                            | 1                      |
| <b>P-cadherin (clone 56)</b>   | <b>1</b>               |
| 1/100                          | 1                      |
| <b>Grand Total</b>             | <b>7</b>               |
